# Supplementary material for: Severe COVID-19 May Impact Hepatic Fibrosis /Hepatic Stellate Cells Activation as Indicated by a Pathway and Population Genetic Study
Source: MDPI journal article supplement (doi:10.3390/genes14010022), 2022-12-22
Supplement: s1 [file s1]

| PubMed searched terms |                       | Number publications |
|-----------------------|-----------------------|---------------------|
| COVID-19              | + genes               | 28                  |
|                       | + protein interaction | 40                  |
|                       | + protein receptor    | 85                  |
| SARS-CoV-2            | + gene                | 66                  |
|                       | + interactome         | 4                   |
|                       | + protein interaction | 31                  |
| SARS-CoV              | + interactome         | 7                   |
|                       | + nsp protein         | 30                  |
| Total                 |                       | 291                 |

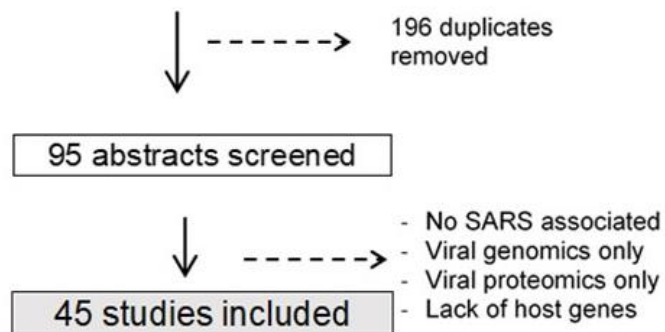

**Supplementary Figure S1: PubMed search between the 31st of March and 25th of May 2020.** Several searching terms were entered in the database to identify all reported SARS-CoV host interactome reported genes.

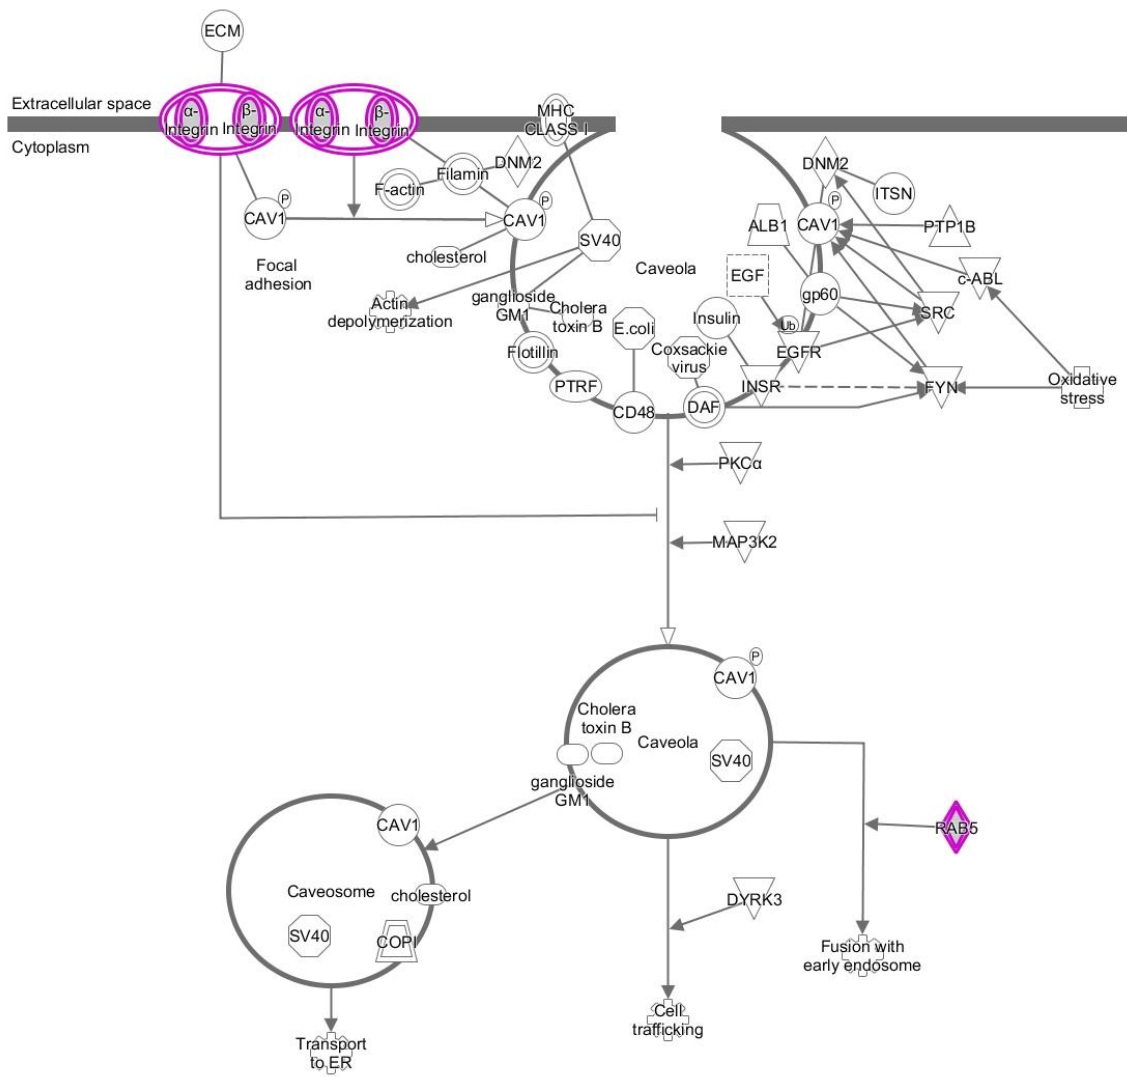

**Supplementary Figure S2: Caveolar-mediated Endocytosis signalling pathway.** Most significant canonical pathway associated with all candidate genes. Purple lines show the literature reported candidate genes in the pathway. Figure generated with IPA software.

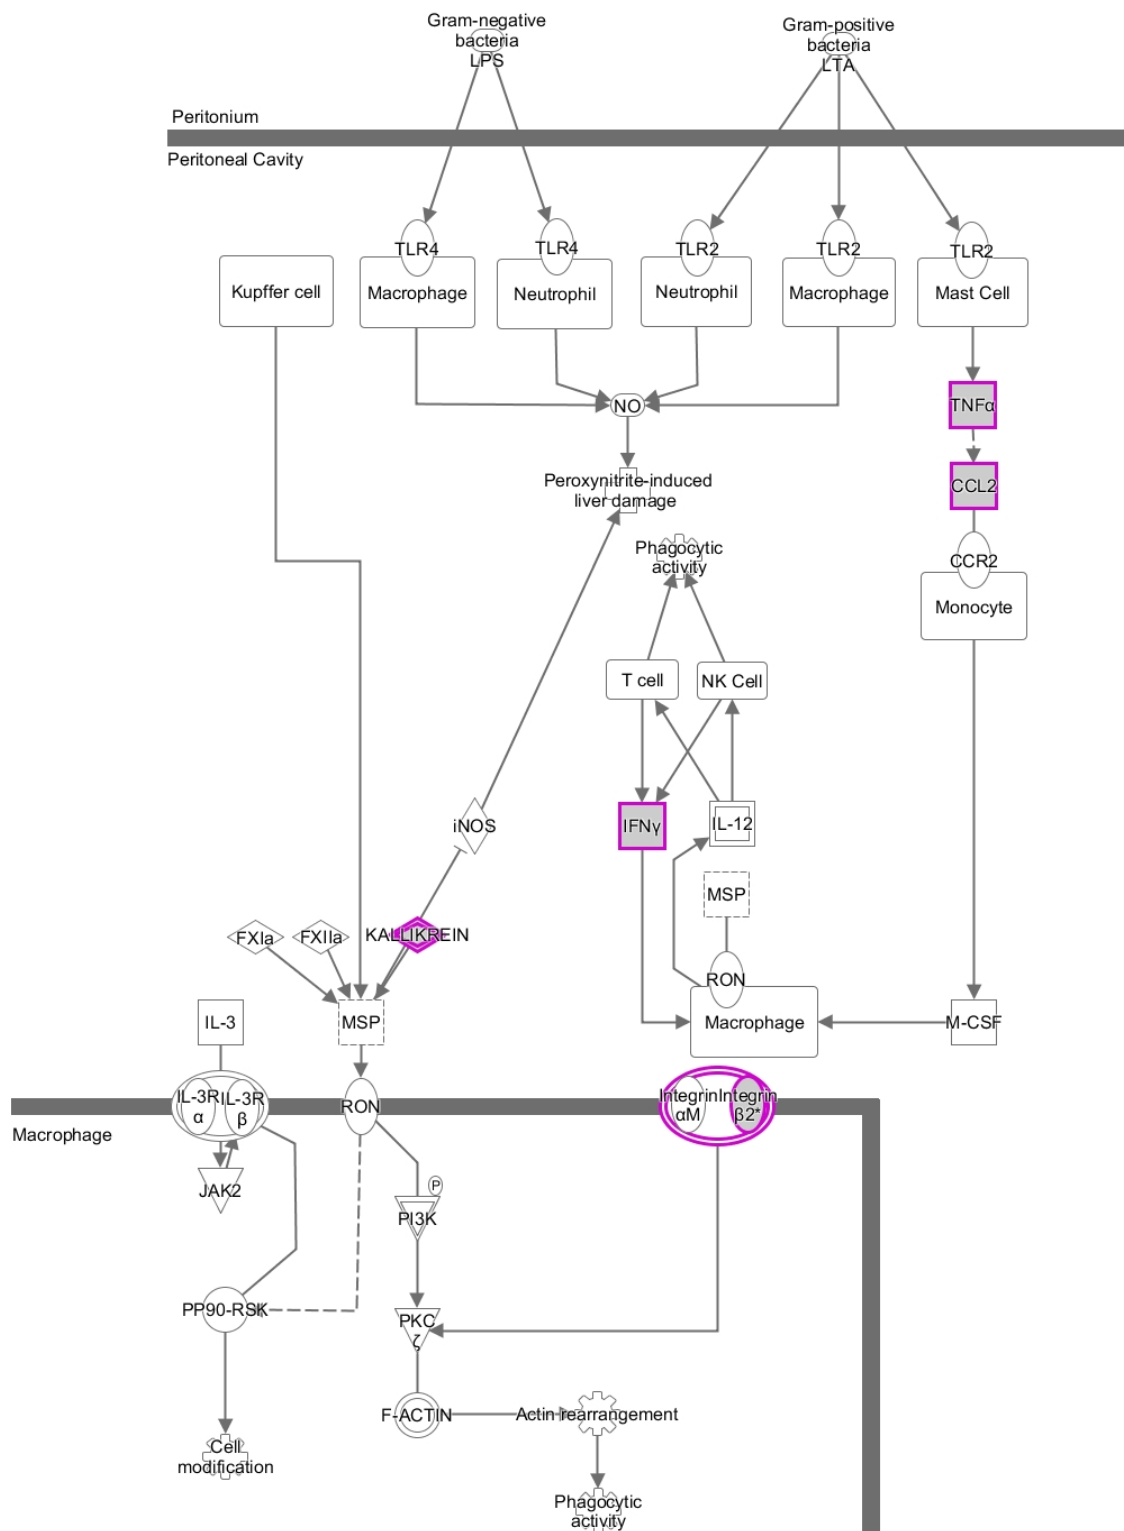

**Supplementary Figure S3: MSP-ROn signalling pathway.** Second most significant canonical pathway associated with all candidate genes. Purple lines show the literature reported candidate genes in the pathway. Figure generated with IPA software.





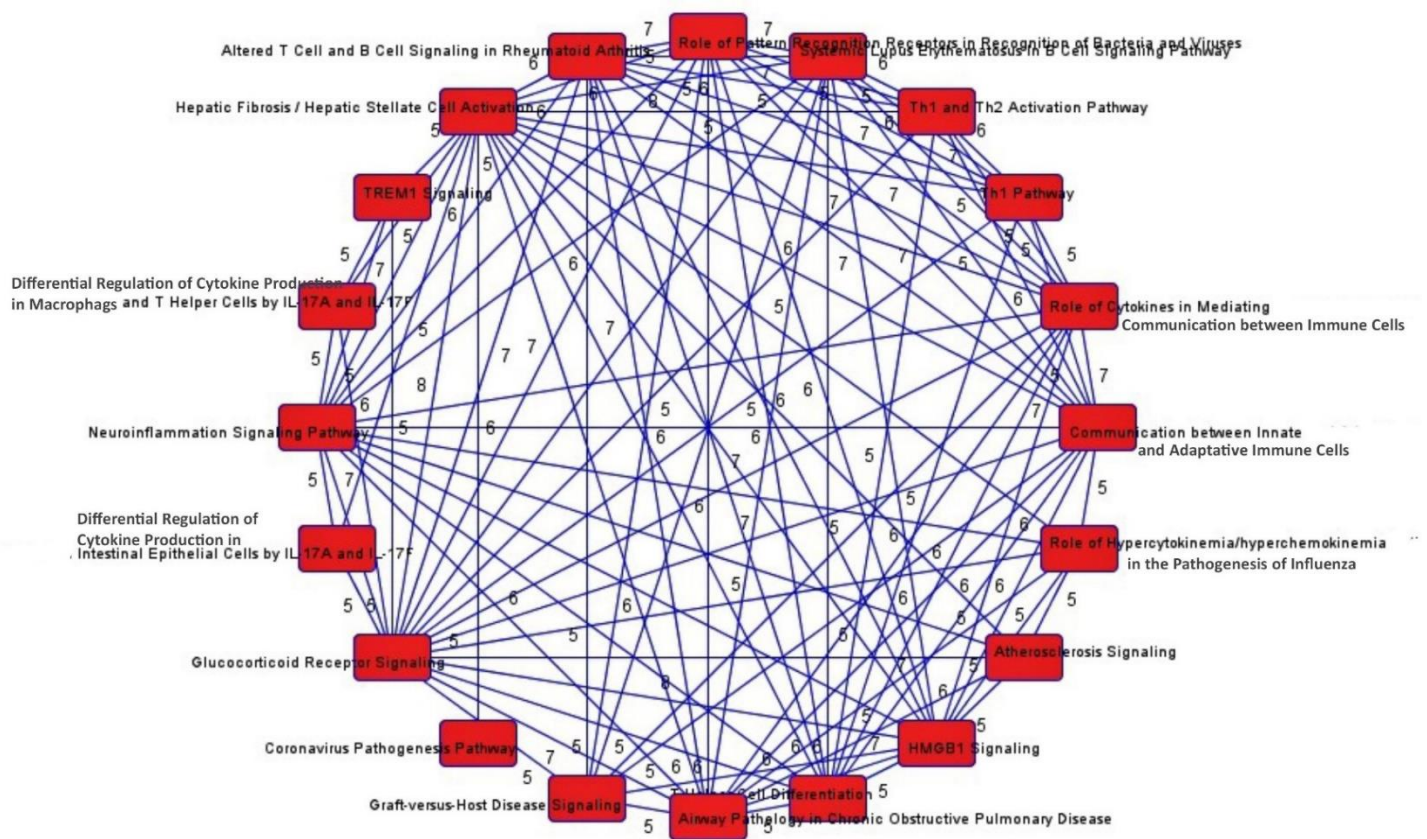

**Supplementary Figure S6: Overlapping of those canonical pathways with common candidate genes.** The 20 most significant pathways with a minimum of five common candidate genes associated with COVID-19 aggressive phenotype are shown. The bright red colour square reflects the high level of significance ( $2.5 \times 10^{-18} < P < 1 \times 10^{-8}$ ). Figure generated by IPA generated software (Qiagen Inc.). P values calculated by Fisher's Exact Test.



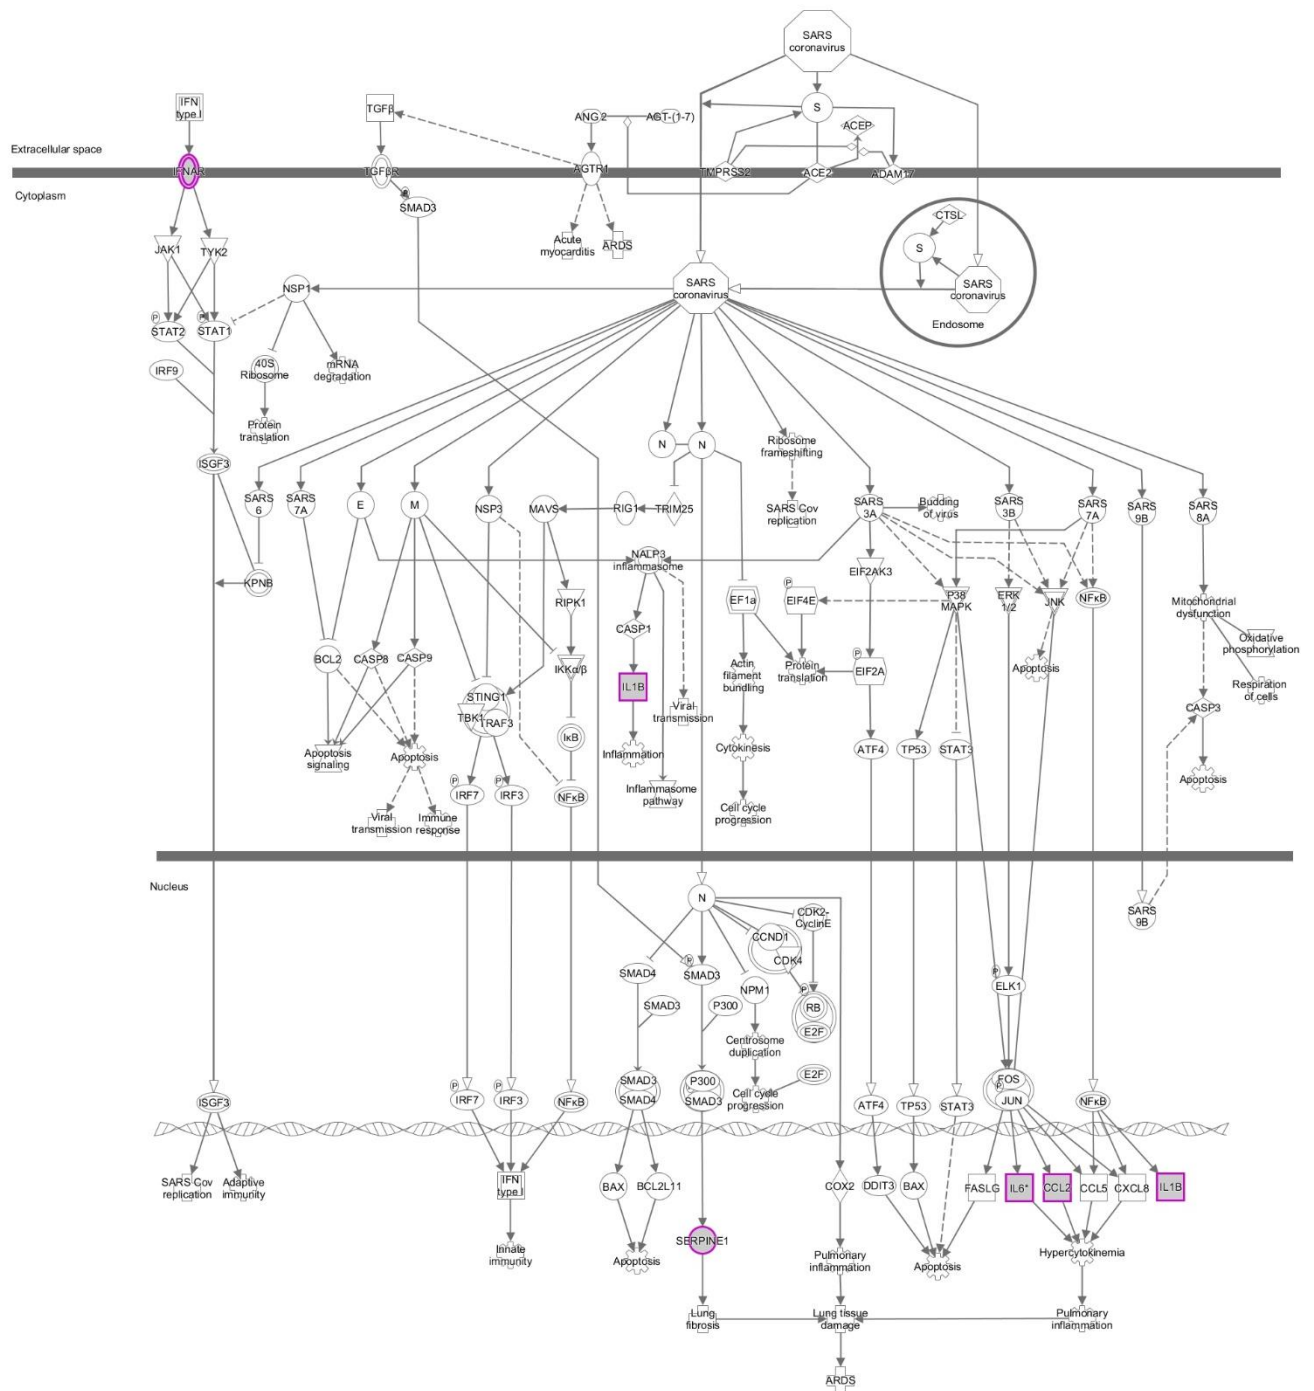

**Supplementary Figure S7: Coronavirus Pathogenesis signalling pathway.** Showing the host-coronavirus pathway. Purple lines show the location of the candidate genes associated with aggressive COVID-19 symptoms in the pathway. Figure generated with IPA software.
