# Supplementary material for: Severe COVID-19 May Impact Hepatic Fibrosis /Hepatic Stellate Cells Activation as Indicated by a Pathway and Population Genetic Study
Source: Genes (Basel). 2022 Dec 22;14(1):22. doi: 10.3390/genes14010022 (PMC9858736; doi:10.3390/genes14010022)
Supplement: Supplementary file 1 [file genes-14-00022-s001.zip]

Archive with 10 entries (10 files):
- genes-1613732-supplementary.pdf
- Supplementary Table S1_all literature search genes.xlsx
- Supplementary Table S2_IPA report literature search genes.xlsx
- Supplementary Table S3_literature search aggressiveness genes only.xlsx
- Supplementary Table S4_IPA report literature search aggressiveness genes.xlsx
- Supplementary Table S5_Covid Deaths.xlsx
- Supplementary Table S6_Caveolar endocytosis pathways gene locations.xlsx
- Supplementary Table S7_MSP-RON pathway gene locations.xlsx
- Supplementary Table S8_Hepatic fribrosis_Stellate cell activation sign pathway.xlsx
- Supplementary Table S9_Communication innate and adapt sign pathway.xlsx
