# Supplementary material for: Severe COVID-19 May Impact Hepatic Fibrosis /Hepatic Stellate Cells Activation as Indicated by a Pathway and Population Genetic Study
Source: Genes (Basel). 2022 Dec 22;14(1):22. doi: 10.3390/genes14010022 (PMC9858736; doi:10.3390/genes14010022)
Supplement: Supplementary file 1 [file genes-14-00022-s001.zip › Supplementary Table S1_all literature search genes.xlsx]

## Sheet: Candidate genes list
Supplementary Table 4: Completed list of genes reported to be associated with SARS- viral entry and immune system evasion analysed for pathway analysis. References presented on Table 1 and Table 2.
Gene symbol
AAR2
AASS
AATF
ABCC1
ACACA
ACAD9
ACE2
ACSL3
ACSL5
ADAM7
ADAM9
ADAMTS1
AGPS
AKAP8
AKAP8L
AKAP9
ALG11
ALG5
ALG8
ANPEP
AP2A2
AP2M1
ARF6
ARL6IP6
ATE1
ATP13A3
ATP5MG
ATP6AP1
BAG5
BAP1
BCKDK
BCS1L
BSG
BST2
BZW2
C1orf50
CASP1
CCDC86
CCL2
CCL3
CCL5
CD209
CD74
CDH1
CDK5RAP2
CENPF
CEP112
CEP135
CEP250
CEP350
CEP68
CHMP2A
CHPF
CHPF2
CISD3
CIT
CLCC1
CLEC4M
CLIP4
CMTR1
CNTRL
COL6A1
COLGALT1
COMT
CRIP2
CRP
CRTC3
CSDE1
CSNK2A1
CSNK2A2
CSNK2B
CTSL
CUL2
CXCL10
CXCL8
CYB5B
CYB5R3
DCAF7
DCAKD
DCTN2
DCTPP1
DDX10
DDX21
DNAJC11
DNAJC19
DNMT1
DPH5
DPP4
DPY19L1
ECSIT
EDEM1
EDEM3
EEF1A1
EIF4B
EIF4E2
EIF4H
ELOB
ELOC
EMC1
ENPEP
EPHX1
ERC1
ERGIC1
ERLEC1
ERMP1
ERO1B
ERP44
EXOSC2
EXOSC3
EXOSC5
EXOSC8
F2RL1
FAM162A
FAM8A1
FAM98A
FAR2
FBLN5
FBN1
FBN2
FBXL12
FGFR1
FKBP10
FKBP15
FKBP1A
FKBP1B
FKBP7
FOXRED2
FURIN
FYCO1
G3BP1
G3BP2
GCC1
GCC2
GDF15
GFER
GGH
GHITM
GIGYF2
GLA
GNB1
GNG5
GOLGA2
GOLGA3
GOLGA7
GOLGB1
GORASP1
GPAA1
GPX1
GRIPAP1
GRPEL1
GSTA4
GTF2F2
HDAC2
HEATR3
HECTD1
HGD
HMGB1
HMOX1
HNRNPA1
HOOK1
HS2ST1
HS6ST2
HSBP1
HSD17B4
HSPA5
HYOU1
IDE
IFNAR1
IFNAR2
IFNG
IKBKE
IL10
IL17RA
IL1B
IL2RA
IL2RB
IL2RG
IL4
IL6
IMPDH2
INHBE
IRAK4
ITGA1
ITGA10
ITGA11
ITGA2
ITGA2B
ITGA3
ITGA4
ITGA5
ITGA6
ITGA7
ITGA8
ITGA9
ITGB1
ITGB1BP1
ITGB1BP2
ITGB2
ITGB2-AS1
ITGB3
ITGB4
ITGB5
ITGB6
ITGB7
ITGB8
JAKMIP1
JUN
KLK1
KLK10
KLK11
KLK12
KLK13
KLK14
KLK15
KLK2
KLK3
KLK4
KLK5
KLK6
KLK7
KLK8
KLK9
KNG1
LARP1
LARP4B
LARP7
LDHA
LDHB
LDHC
LDHD
LMAN2
LOX
LRRK2
MAP7D1
MARK1
MARK2
MARK3
MAT2B
MAVS
MCCC2
MCL1
MDN1
MEPCE
MFGE8
MIB1
MIF
MIF4GD
MIPOL1
MOGS
MOV10
MPHOSPH10
MRPS2
MRPS25
MRPS27
MRPS5
MTARC1
MTCH1
MYCBP2
NARS2
NAT14
NDFIP2
NDUFA10
NDUFAF1
NDUFAF2
NDUFB9
NEK9
NEU1
NFKB1
NFKB2
NGDN
NGLY1
NIN
NINL
NLRP3
NLRX1
NOL10
NPC2
NPM1
NPTX1
NSD2
NUP210
NUP214
NUP54
NUP58
NUP62
NUP88
NUP98
NUTF2
OS9
PABPC1
PABPC4
PARP10
PARP14
PARP15
PCNT
PCSK6
PDE4DIP
PDZD11
PIGO
PIGS
PIKFYVE
PKP2
PLAT
PLAUR
PLD3
PLEKHA5
PLEKHF2
PLOD2
POFUT1
POGLUT2
POGLUT3
POLA1
POLA2
POR
PPARG
PPIA
PPIB
PPIG
PPIH
PPIL3
PPT1
PRIM1
PRIM2
PRKACA
PRKAR2A
PRKAR2B
PRRC2B
PTBP2
PTGES2
PUSL1
PVR
PYCARD
QSOX2
RAB10
RAB14
RAB18
RAB1A
RAB2A
RAB5C
RAB7A
RAB8A
RAE1
RALA
RAP1GDS1
RBM28
RBM41
RBX1
RDX
RETREG3
RHOA
RIPK1
RNF128
RNF41
ROS1
RPL36
RRP9
RTN4
SBNO1
SCAP
SCARB1
SCCPDH
SDF2
SELENOS
SEPSECS
SERPINE1
SIGMAR1
SIL1
SIRT5
SLC25A21
SLC27A2
SLC30A6
SLC9A3R1
SLU7
SMOC1
SNIP1
SPART
SRP19
SRP54
SRP72
STAT1
STAT2
STC2
STING1
STOML2
SUN2
TAPT1
TARS2
TBCA
TBK1
TBKBP1
TCF12
THTPA
TIMM10
TIMM10B
TIMM29
TIMM8B
TIMM9
TLE1
TLE3
TLE5
TM2D3
TMED5
TMEM39B
TMEM97
TMPRSS11D
TMPRSS2
TNF
TOMM70
TOR1A
TOR1AIP1
TPCN2
TRAF3
TRAF6
TRIM59
TRMT1
TUBGCP2
TYSND1
UBAP2
UBAP2L
UBXN8
UCHL1
UCHL3
UGGT2
UPF1
USP13
USP54
VEGFA
VPS11
VPS39
WASHC4
WFS1
XPO1
ZC3H7A
ZDHHC5
ZNF318
ZNF503
ZYG11B

## Sheet: viral entry and immune evasion 
Genes associated with viral entry and immune evasion reported in one study.
Candidate genes	Virus	Host cell response/viral mechanism	Research assay	Ref.
ADAM17	SARS-CoV1	Competes with TMPRSS2 to cleave ACE2.	In vitro. Reporter gene assays, recombinant virus transduction, gene and protein expression analysis.	46
CD26 (or DPP4)	SARS-CoV2	Interaction with S1 domain glycoprotein. May play a role in immunoregulation and virulence.	In silico structure and glycoprotein binding models.	56
DPP4 (or CD26)	MERS-CoV	After S interaction, it is activated by TMPRSS2 or cathepsin-L. Some isoforms associated with lower viral intake.	In vitro. MERS-CoV S cloned in human cell model. Co-IP, flow cytometry and viral titter quantification.	57
TNF-α	SARS-CoV1	SARS S protein induces TACE- dependent cleavage of ACE2. Associated with early stage infections.	In vitro. Gene cloning and human cell viral infection, gene expression and ACE2 activity assays.	45
Furin	SARS-CoV2 specific	Furin-like cleave site in the S2 domain associated with increased virulence and viral replication efficiency.	In vitro. SARS S protein genomic and proteomics analysis.	52
LRRK2, ACSL5, HSD17B4, EPHX1, MCCC2, GSTA4, ACACA, HGD, ROS1, CRIP2	ACE2 studies	Highest positive expression correlation score with ACE2 in lung (P ≤ 10−6). CRIP2, lowest negative correlation expression (P = 5 × 10−8).	In silico assay using RNA-seq lung normal tissue (TCGA), GEO and GO.	131
PIKfyve	SARS-CoV2	Main enzyme to synthesize early/late endosome regulators. Assists SARS-CoV2 pseudovirions in vitro entry.	In vitro. SARS-CoV2 S protein pseudovirions expression system in human lung cell model.	9
TPC2	SARS-CoV2	Downstream effector of main endosome formation regulator PI(3,5)P2. Assists SARS-CoV2 pseudovirions in vitro entry.	In vitro. SARS-CoV2 S protein pseudovirus expression system in human lung cell model.	9
GRP78	SARS-CoV2	Encoded by Hsp5a and targeted by PeP42 in cancer cells. S COVID-19 protein model predicts similar binding site.	In silico structure and binding predictions of S proteins. Data sourced from HCoV (NCBI), EMBL-EBI.	58
CMTR1 (2'-O-MTase)	SARS-CoV	Predicted to methylate the viral mRNA and, escaping antiviral recognition.	In silico. Bioinformatics binding prediction studies.	132
IL8	SARS-CoV1	Increased production after S protein activation.	In vitro. Reporter gene assays, recombinant virus transduction in in lung epithelial model. EMSA, gene and protein expression assays.	66
ubiquitin-aldehyde	SARS-CoV2	Interaction with Nsp3 PLP binding site domain. This highly conserved binding site suggests a vital role in SARS virus.	In silico: NCBI Virus repository, MODELLER software, Protein Data Bank, Y2H and literature mining.	11
NLRP3	SARS-CoV1	Activated after SARS-CoV1 E protein calcium ion channel formation. It stimulates inflammasome by overproduction of cytokines.	In vitro. SARS-CoV1 E protein synthetic peptide analysis.	67
60s	Nsp1 studies	After interacting with Nsp1, 60s is suppressed from joining 40s and the 80s translationally competent ribosome cannot translate.	In vitro. Expression, translation and rRNA immunoprecipitation and polysome assays. Ribosome binding assay.	61
STAT1	SARS-CoV1	SARS-CoV1 Nsp1 suppresses STAT1 phosphorylation, affecting IFN production.	In vitro. Reporter gene assays followed by immunoblot and northern blot analyses.	68
PPIA, PPIB, PPIH, PPIG, FKBP1A, FKBP1B	SARS-CoV1	Human cyclophilins/immunophilin that modulate the Calcineurin/NFAT pathway after binding Nsp1. Possibly associated with viral pathogenesis.	In vitro. Reporter gene assays followed by SARS-CoV transduction and inhibition assays.	133
IRF3	SARS-CoV1	SARS PLP proteases indirectly inhibits IRF3 phosphorylation and its nuclear translocation, suppressing IRF3-dependen IFN production and its pathway.	In vitro. Gene cloning, mRNA and protein expression analysis followed by immunoprecipitation.	69
TRAF3, IL1B	SARS-CoV1	After viral ORF3a is translated, it interacts with host’s TRAF3, activating the NF-kB pathway and promoting IL1B transcription.	In vitro. Gene cloning, cell transfection, reporter gene and gene expression analysis.	70
EDM1, OS9	SARS-CoV1	Nsp3 and Nsp4 interactions initiate RTC synthesis.	In vitro. Gene cloning, recombinant BAC-SARS-Nsp3 expression and IP.	74
BTS-2	SARS-CoV1	SARS ORF7a inhibits BTS-2 glycosylation, allowing for new virions to be released from host cell.	In vitro. Gene cloning, human cells transfection, IP and CD analysis.	134
EEF1A1, RNF128*, MIF4GD, EIF4B, DCTN2, NDUFA10, ACE2	SARS-CoV2	Most significantly uP-regulated proteins	In silico analysis using COVID-19 patients’ transcriptome data	7
MCL1	SARS-CoV2	Most significantly down-regulated proteins	In silico analysis using COVID-19 patients’ transcriptome data	7
CD74, MIF	ssRNA viruses	Most active ACE2 binding membrane receptors in 13 human tissues (present in macrophage)	Single cell in silico ligand-receptor affinity assays. Data sourced from GEO, Human Cell Atlas, Viral Receptor and Membranome databases°	54
Calcineurin/NFAT pathway	SARS-CoV1, SARS-CoV2	Activation after Nsp1-host proteins interactions	In silico. Virus-host proteins resourced from Y2H and literature data mining.	11133
			In vitro. Reporter gene assays followed by SARS-CoV transduction and inhibition assays.
Acetyl-CoA and leucine conversion/degradation and cholesterol biosynthesis	N/A	Enriched pathways after ACE2-activated networks in lungs, bronchial epithelium and oral mucosa tissues	In silico assay using RNA-seq lung (TCGA, controls), GEO and GO data	131
TRAF6-NF-kB	Coxsackievirus	Monocyte migration and potential myocarditis	In vivo assays in heart models after coronavirus inoculation	60
JUN, XPO1, NPM1, and HNRNPA1	SARS-CoV1, MERS-CoV, HCoV-229E, and HCoV-NL63	Protein clusters with highest number of pathways activated	In silico analysis. Virus-host proteins resourced from Y2H, and in vitro Co-IP and RNA knock down experiment	135
MTOR	IBV and M-CoV	Autophagosome inactivation and viral degradation halt	In vitro human coronavirus models.	136
MAPKs and AP-1 pathways	SARS-CoV1	Activated in lung cell models after IL8 S viral protein activation	In vitro. Reporter gene assays, recombinant virus transduction followed by gene, protein and EMSA assays	66
STING-TRAF3-TBK1	SARS-CoV1	SARS-CoV PLP disrupts both complexes, suppressing IRF3 activation and IFN antiviral signalling	In vitro. SARS-CoV gene cloning and lung cell model. Protein and Co-IP analysis and dimer detection	64,65
And STING-MAVS-TBK1/IKKε complexes
NLRP3, ASC and caspase 1 complex	SARS-CoV1	Inflammasome complex recruited after viral ORF3a and host TRAF3 interaction	In vitro. Gene cloning, BAC-ORF3a expression system, CRISPR, gene expression	70
