# Supplementary material for: Severe COVID-19 May Impact Hepatic Fibrosis /Hepatic Stellate Cells Activation as Indicated by a Pathway and Population Genetic Study
Source: Genes (Basel). 2022 Dec 22;14(1):22. doi: 10.3390/genes14010022 (PMC9858736; doi:10.3390/genes14010022)
Supplement: Supplementary file 1 [file genes-14-00022-s001.zip › Supplementary Table S3_literature search aggressiveness genes only.xlsx]

## Sheet: Candidate genes
Supplementary Table 3: Genes reported to be associated with COVID-19 disease severity and analysed for pathway analysis. References presented on Table 4.
GeneSymbol
CRP
IL10
APOA2
IL1B
IL2
CXCL10
IL4
TNF
VEGFA
IL6
SERPINE1
LDHA
LDHC
IFNG
LDHB
CDH1
LDHD
CCL2
PLAUR
IFNAR1
IFNAR2
