# Supplementary material for: Severe COVID-19 May Impact Hepatic Fibrosis /Hepatic Stellate Cells Activation as Indicated by a Pathway and Population Genetic Study
Source: Genes (Basel). 2022 Dec 22;14(1):22. doi: 10.3390/genes14010022 (PMC9858736; doi:10.3390/genes14010022)
Supplement: Supplementary file 1 [file genes-14-00022-s001.zip › Supplementary Table S5_Covid Deaths.xlsx]

## Sheet: Sheet1
Supplementary Table 5: COVID-19 mortality rate in the European Union, calculated as per 100,000 people of the population for every country.
	Country	Death rate by	Country	Death rate by
		7th April 2020		26th February 2021
1	Spain	27.9	Romania	377
2	Italy	27.2	Belgium	191.9
3	Belgium	14.6	Czechia	184.8
4	France	13.6	UK	183.8
5	Netherlands	10.7	Slovenia	182.7
6	UK	7.9	Italy	160.2
7	Luxembourg	6.8	Portugal	157
8	Sweden	4.7	Hungary	148.9
9	Ireland	3.5	Spain	145.9
10	Denmark	3.2	Bulgaria	143.2
Total country population as of 1st of January 2020 (https://ec.europa.eu/eurostat/databrowser/ ) and COVID-19 total deaths from WHO daily reports (https://covid19.who.int/).
